# Supplementary material for: Differentiation‐associated urothelial cytochrome P450 oxidoreductase predicates the xenobiotic‐metabolizing activity of “luminal” muscle‐invasive bladder cancers
Source: PubMed Central journal article supplement (PMC5900743; doi:10.1002/mc.22784), 2018-02-01
Supplement: MC-57-606-s002.pdf [file MC-57-606-s002.pdf]

**Supplementary Table 1** – Clinical characteristics and histological assessment of MIBC specimens included in the study.

| POR Labelling Intensity | Classified as POR over-expressing | GATA3 Postive Nuclei (%) | KRT5/6-positive tissue (%) | Classified as Basal or Luminal | Year of cystectomy | Age at cystectomy | Gender | 2010 TNM Tumour Stage | 1973 WHO Grading | Number of Lymph Nodes Involved | Clinical Signs of Metastasis |
|-------------------------|-----------------------------------|--------------------------|----------------------------|--------------------------------|--------------------|-------------------|--------|-----------------------|------------------|--------------------------------|------------------------------|
| 147.00                  | Yes                               | 47.58                    | Sample Damaged             | Not classified (no KRT5/6)     | 2001               | 75                | Male   | 6                     | 3                | 2                              | Yes                          |
| 122.67                  | Yes                               | 84.90                    | 15.52                      | Luminal                        | 2005               | 75                | Male   | 6                     | 3                | 2                              | No                           |
| 106.00                  | Yes                               | 86.25                    | 97.68                      | Luminal                        | 2005               | 71                | Male   | 5                     | 3                | 0                              | No                           |
| 101.00                  | Yes                               | 79.48                    | 0.20                       | Luminal                        | 2002               | 69                | Male   | 5                     | 3                | 2                              | No                           |
| 98.00                   | Yes                               | 49.96                    | 50.47                      | Luminal                        | 2004               | 71                | Male   | 6                     | 3                | 1                              | Yes                          |
| 81.00                   | Yes                               | 95.02                    | 0.24                       | Luminal                        | 2004               | 61                | Male   | 6                     | 3                | 2                              | No                           |
| 79.00                   | Yes                               | 90.79                    | 88.98                      | Luminal                        | 2005               | 72                | Female | 5                     | 3                | 0                              | No                           |
| 72.00                   | Yes                               | 79.94                    | 28.35                      | Luminal                        | 2001               | 60                | Male   | 5                     | 3                | 2                              | No                           |
| 68.00                   | Yes                               | 91.29                    | 0.00                       | Luminal                        | 2006               | 53                | Male   | 6                     | 3                | 2                              | No                           |
| 58.25                   | No                                | 87.93                    | 44.37                      | Luminal                        | 2006               | 78                | Male   | 6                     | 3                | 2                              | No                           |
| 57.25                   | No                                | 34.86                    | 71.89                      | Basal                          | 2000               | 83                | Male   | 6                     | 3                | 2                              | No                           |
| 53.00                   | No                                | 98.49                    | 0.00                       | Luminal                        | 2005               | 62                | Female | 4                     | 3                | 0                              | No                           |
| 52.00                   | No                                | 93.42                    | 4.21                       | Luminal                        | 2006               | 75                | Male   | 6                     | 3                | 2                              | Yes                          |
| 51.00                   | No                                | 39.23                    | 0.93                       | Luminal                        | 2000               | 76                | Male   | 6                     | 3                | 2                              | No                           |
| 46.00                   | No                                | 94.12                    | 0.00                       | Luminal                        | 2003               | 67                | Male   | 6                     | 3                | 2                              | No                           |
| 45.00                   | No                                | 89.02                    | 0.00                       | Luminal                        | 2005               | 73                | Female | 5                     | 3                | 0                              | No                           |
| 43.00                   | No                                | 12.45                    | 0.00                       | Luminal                        | 2007               | 74                | Male   | 5                     | 3                | 1                              | Yes                          |
| 42.50                   | No                                | 87.43                    | 0.00                       | Luminal                        | 2005               | 55                | Male   | 5                     | 3                | 0                              | No                           |
| 41.00                   | No                                | 79.26                    | 0.00                       | Luminal                        | 1998               | 81                | Male   | 5                     | 3                | 1                              | Yes                          |
| 38.00                   | No                                | 70.39                    | 23.76                      | Luminal                        | 2000               | 72                | Male   | 3                     | 3                | 1                              | No                           |
| 36.50                   | No                                | 48.54                    | 85.13                      | Basal                          | 2005               | 68                | Male   | 5                     | 3                | 0                              | No                           |
| 36.00                   | No                                | 22.35                    | 91.32                      | Basal                          | 2003               | 50                | Female | 5                     | 3                | 2                              | No                           |
| 36.00                   | No                                | 2.35                     | 0.00                       | Luminal                        | 2007               | 78                | Male   | 6                     | 3                | 0                              | No                           |
| 34.33                   | No                                | 95.90                    | 0.11                       | Luminal                        | 2004               | 80                | Male   | 0                     |                  | 2                              | No                           |
| 32.00                   | No                                | 50.12                    | 0.00                       | Luminal                        | 1999               | 59                | Male   | 5                     | 3                | 0                              | No                           |
| 31.20                   | No                                | 85.63                    | 2.49                       | Luminal                        | 2008               | 83                | Male   | 6                     | 3                |                                |                              |
| 31.00                   | No                                | 77.84                    | 0.04                       | Luminal                        | 2001               | 79                | Male   | 6                     | 3                | 2                              | No                           |

|       |    |       |       |         |      |    |        |   |   |   |     |
|-------|----|-------|-------|---------|------|----|--------|---|---|---|-----|
| 26.50 | No | 87.55 | 5.23  | Luminal | 2003 | 76 | Male   | 5 | 3 | 2 | No  |
| 25.00 | No | 75.15 | 3.23  | Luminal | 2003 | 56 | Male   | 6 | 3 | 1 | Yes |
| 24.00 | No | 7.56  | 0.01  | Luminal | 2002 | 73 | Male   | 4 | 3 | 1 | No  |
| 24.00 | No | 89.65 | 0.00  | Luminal | 2005 | 55 | Female | 5 | 3 | 1 | No  |
| 23.00 | No | 94.11 | 0.00  | Luminal | 2006 | 81 | Male   | 5 | 3 | 1 | No  |
| 22.00 | No | 94.03 | 0.00  | Luminal | 2006 | 66 | Male   | 5 | 3 | 2 | No  |
| 22.00 | No | 58.51 | 0.00  | Luminal | 2008 | 80 | Female | 6 | 3 | 1 | No  |
| 22.00 | No | 39.91 | 35.77 | Luminal | 2007 | 83 | Female | 5 | 3 | 0 | No  |
| 21.86 | No | 0.68  | 55.49 | Basal   | 1996 | 83 | Male   | 5 | 3 |   |     |
| 21.50 | No | 83.72 | 4.81  | Luminal | 2000 | 48 | Male   | 6 | 3 | 2 | No  |
| 21.25 | No | 94.74 | 0.03  | Luminal | 2002 | 79 | Female | 6 | 3 | 0 | Yes |
| 21.00 | No | 90.59 | 0.00  | Luminal | 2003 | 56 | Male   | 6 | 3 | 1 | Yes |
| 20.17 | No | 32.65 | 0.32  | Luminal | 2006 | 73 | Female | 5 | 3 | 2 | No  |
| 18.50 | No | 72.57 | 0.62  | Luminal | 2004 | 97 | Male   | 6 | 3 | 1 | Yes |
| 18.50 | No | 1.36  | 2.65  | Luminal | 1998 | 60 | Male   | 5 | 3 | 2 | No  |
| 17.33 | No | 98.16 | 0.11  | Luminal | 2005 | 81 | Male   | 6 | 3 | 2 | No  |
| 17.00 | No | 96.42 | 0.00  | Luminal | 2003 | 67 | Male   | 6 | 3 | 2 | No  |
| 16.75 | No | 0.99  | 47.44 | Basal   | 2008 | 66 | Male   | 5 | 3 | 2 | No  |
| 16.00 | No | 87.89 | 0.00  | Luminal | 2004 | 70 | Male   | 5 | 3 | 2 | No  |
| 15.13 | No | 74.10 | 0.21  | Luminal | 2005 | 81 | Male   | 5 | 3 | 2 | No  |
| 14.80 | No | 33.24 | 0.00  | Luminal | 2007 | 70 | Male   | 6 | 3 | 2 | Yes |
| 14.67 | No | 1.14  | 52.51 | Basal   | 1998 | 67 | Male   | 6 | 3 | 2 | No  |
| 14.50 | No | 10.65 | 18.68 | Luminal | 2007 | 70 | Male   | 5 | 3 | 1 | No  |
| 14.00 | No | 1.34  | 47.73 | Basal   | 1999 | 65 | Male   | 6 | 3 | 2 | Yes |
| 13.50 | No | 90.16 | 1.50  | Luminal | 2007 | 67 | Male   | 6 | 3 | 1 | No  |
| 13.50 | No | 14.27 | 59.45 | Basal   | 2004 | 80 | Female | 5 | 3 | 2 | No  |
| 12.50 | No | 0.05  | 72.21 | Basal   | 2006 | 71 | Female | 6 | 3 | 2 | No  |
| 12.50 | No | 67.36 | 0.40  | Luminal | 2008 | 74 | Male   | 5 | 3 | 1 | No  |
| 12.25 | No | 85.86 | 0.00  | Luminal | 2000 | 74 | Male   | 6 | 3 | 0 | Yes |
| 11.67 | No | 7.74  | 33.79 | Basal   | 2007 | 61 | Male   | 5 | 3 | 1 | No  |
| 10.40 | No | 72.28 | 1.86  | Luminal | 2008 | 72 | Male   | 5 | 3 | 2 | No  |
| 10.00 | No | 1.43  | 98.34 | Basal   | 2003 | 64 | Female | 6 | 3 | 1 | No  |
| 0.00  | No | 0.00  | 0.01  | Luminal | 1998 | 59 | Male   | 5 | 3 | 2 | No  |
